# Supplementary material for: The red light emission in 2D (C4SH3CH2NH3)2SnI4and (C4OH7CH2NH3)2SnI4perovskites
Source: Royal Society of Chemistry journal article supplement (doi:10.1039/d1dt01465j), 2021-01-01
Supplement: d1dt01465j1.pdf [file d1dt01465j1.pdf]

## Supporting Information

### The Red Light Emission in 2D $(\text{C}_4\text{SH}_3\text{CH}_2\text{NH}_3)_2\text{SnI}_4$ and $(\text{C}_4\text{OH}_7\text{CH}_2\text{NH}_3)_2\text{SnI}_4$ Perovskites

**Mi-Hee Jung<sup>\*,†</sup>**

□Department of Nanotechnology and Advanced Materials Engineering, Sejong University, 209, Neungdong-ro, Gwangjin-gu, Seoul 05006, Republic of Korea; Fax: +82-2-3408-4342; Tel: +82-2-6935-2597

\*To whom correspondence should be addressed.

E-mail: mhjung@sejong.ac.kr

**Table S1.** Elemental analysis of the (TPM)<sub>2</sub>SnI<sub>4</sub> perovskite performed by X-ray fluorescence spectroscopy

| No. | Component | Result  | Unit  | Detection limit | Elemental line | Intensity |
|-----|-----------|---------|-------|-----------------|----------------|-----------|
| 1   | C         | 11.8588 | mass% | 0.10757         | C-KA           | 19.6850   |
| 2   | S         | 9.2842  | mass% | 0.00368         | S-KA           | 144.2332  |
| 3   | Cl        | 0.4592  | mass% | 0.00909         | Cl-KA          | 1.5698    |
| 4   | Sn        | 13.3760 | mass% | 0.06005         | Sn-KA          | 23.6686   |
| 5   | I         | 65.0218 | mass% | 0.22799         | I-KB1          | 84.3837   |

**Table S2.** Elemental analysis of the (TFF)<sub>2</sub>SnI<sub>4</sub> perovskite performed by X-ray fluorescence spectroscopy

| <b>No.</b> | <b>Component</b> | <b>Result</b> | <b>Unit</b> | <b>Detection limit</b> | <b>Elemental line</b> | <b>Intensity</b> |
|------------|------------------|---------------|-------------|------------------------|-----------------------|------------------|
| 1          | C                | 7.4117        | mass%       | 0.05228                | C-KA                  | 25.1218          |
| 2          | Cl               | 0.0683        | mass%       | 0.00856                | Cl-KA                 | 0.2706           |
| 3          | Sn               | 11.2432       | mass%       | 0.06599                | Sn-KA                 | 19.8557          |
| 4          | I                | 81.2768       | mass%       | 0.25079                | I -KB1                | 105.8344         |

**Table S3.** Crystallographic data for (TPM)<sub>2</sub>SnI<sub>4</sub> and (TFF)<sub>2</sub>SnI<sub>4</sub> perovskites prepared from SnO

| Empirical formula                                    | (TPM) <sub>2</sub> SnI <sub>4</sub>            | (TFF) <sub>2</sub> SnI <sub>4</sub>          |
|------------------------------------------------------|------------------------------------------------|----------------------------------------------|
| Formula weight                                       | 854.66                                         | 830.60                                       |
| Temperature (K)                                      | 298                                            | 298                                          |
| Wavelength ( Å )                                     | 0.700                                          | 0.700                                        |
| Crystal system                                       | Orthorhombic                                   | Monoclinic                                   |
| Space group                                          | <i>Pbca</i>                                    | <i>P2<sub>1</sub>/c</i>                      |
| Unit cell dimensions                                 |                                                |                                              |
| a, Å                                                 | 8.7730(18)                                     | 16.341(5)                                    |
| b, Å                                                 | 8.6580(17)                                     | 8.8044(17)                                   |
| c, Å                                                 | 28.961(6)                                      | 8.7912(17)                                   |
| α, deg                                               | 90°                                            | 90°                                          |
| β, deg                                               | 90°                                            | 91.19(2)°                                    |
| γ, deg                                               | 90°                                            | 90°                                          |
| Volume( Å <sup>3</sup> )                             | 2199.8(8)                                      | 1264.6(5)                                    |
| Z                                                    | 4                                              | 2                                            |
| Density (calculated)(<br>Mg/m <sup>3</sup> )         | 2.581                                          | 2.181                                        |
| Absorption coefficient(<br>mm <sup>-1</sup> )        | 6.589                                          | 5.894                                        |
| F(000)                                               | 1536                                           | 752                                          |
| Crystal size( mm <sup>3</sup> )                      | 0.570 × 0.073 × 0.033                          | 0.670 × 0.047 × 0.036                        |
| Theta range for data<br>collection                   | 2.674 to 33.555°                               | 2.628 to 30.550°                             |
| Index ranges                                         | -12 ≤ h ≤ 12,<br>-11 ≤ k ≤ 11,<br>-42 ≤ l ≤ 42 | -22 ≤ h ≤ 22<br>-12 ≤ k ≤ 11<br>-11 ≤ l ≤ 12 |
| Reflections collected                                | 22122                                          | 15559                                        |
| Independent reflections                              | 3767 [R(int) = 0.1093]                         | 3368 [R(int) = 0.1213]                       |
| Completeness to theta =<br>25.242°                   | 97.3 %                                         | 99.9 %                                       |
| Refinement method                                    | Full-matrix least-squares on F <sup>2</sup>    | Full-matrix least-squares on F <sup>2</sup>  |
| Data/restraints/<br>parameters                       | 3767 / 6 / 89                                  | 3368 / 45 / 88                               |
| Goodness-of-fit on F <sup>2</sup>                    | 1.208                                          | 1.159                                        |
| Final R indices<br>[I > 2σ(I)]                       | R1 = 0.1587,<br>wR2 = 0.2828                   | R1 = 0.1630,<br>wR2 = 0.3832                 |
| R indices (all data)                                 | R1 = 0.1694,<br>wR2 = 0.2910                   | R1 = 0.1744,<br>wR2 = 0.3905                 |
| Absolute structure<br>parameter                      |                                                |                                              |
| Extinction coefficient                               | 0.175(11)                                      |                                              |
| Largest diff. peak and<br>hole ( e Å <sup>-3</sup> ) | 4.710 and -9.534                               | 12.193 and -3.889                            |

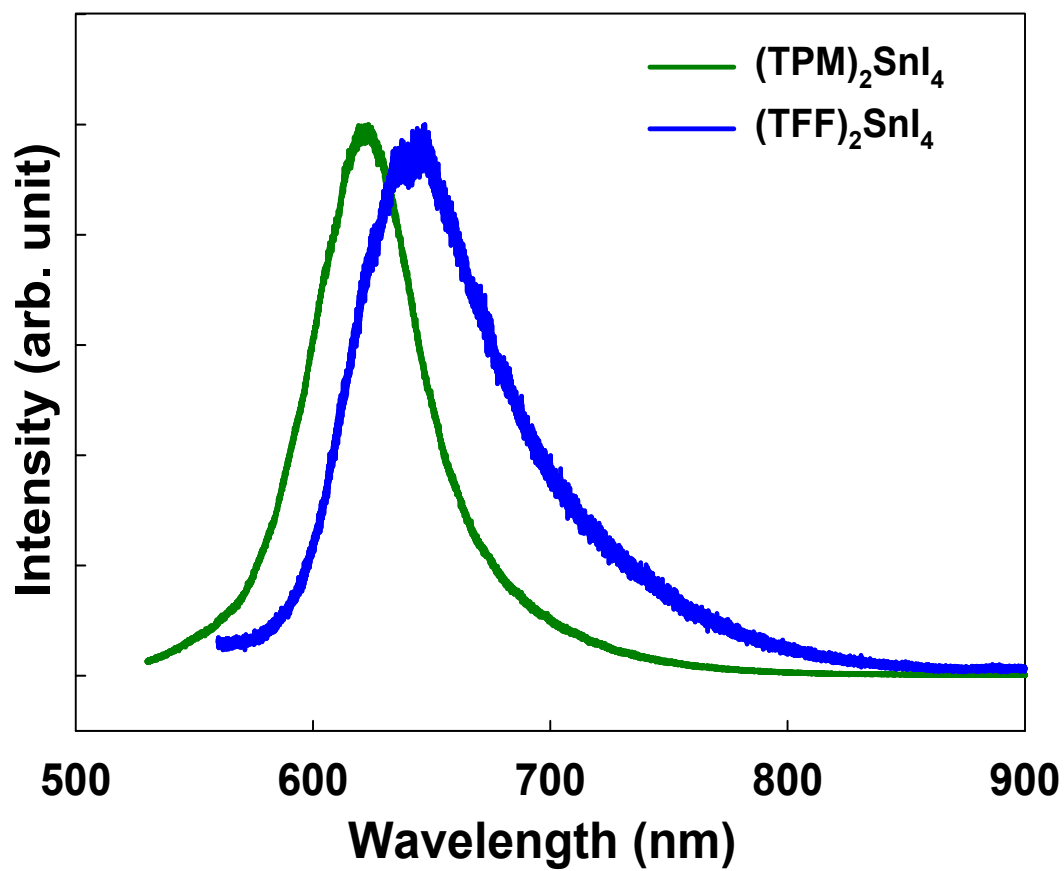

**Figure S1.** Photoluminescence spectra for the crystals of (TPM)<sub>2</sub>SnI<sub>4</sub> and (TFF)<sub>2</sub>SnI<sub>4</sub> perovskites prepared from SnO. The excitation wavelength is 514 nm.

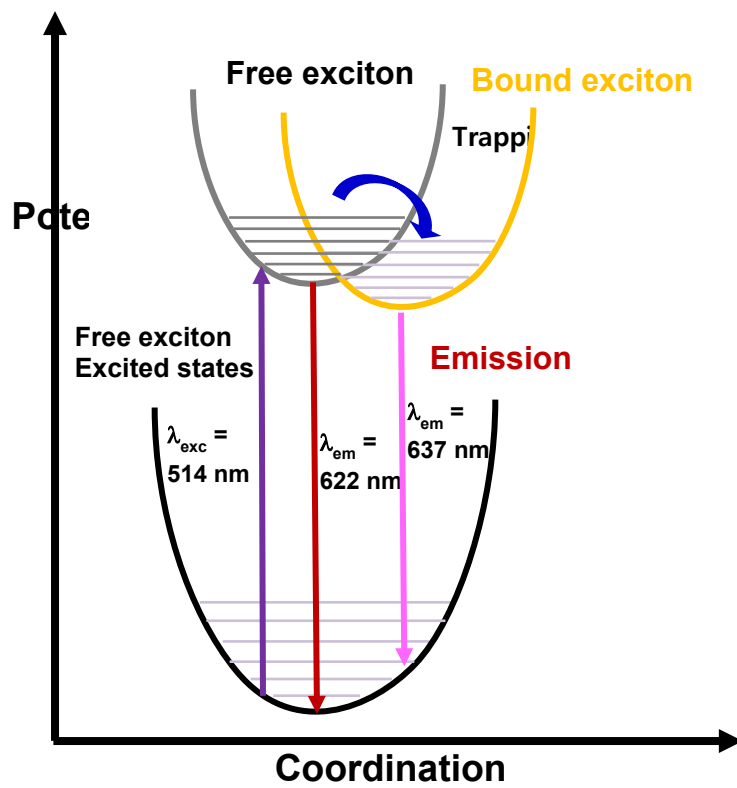

**Figure S2.** Configuration coordinate diagram for free exciton and bound exciton state for the compound  $(\text{TPM})_2\text{SnI}_4$

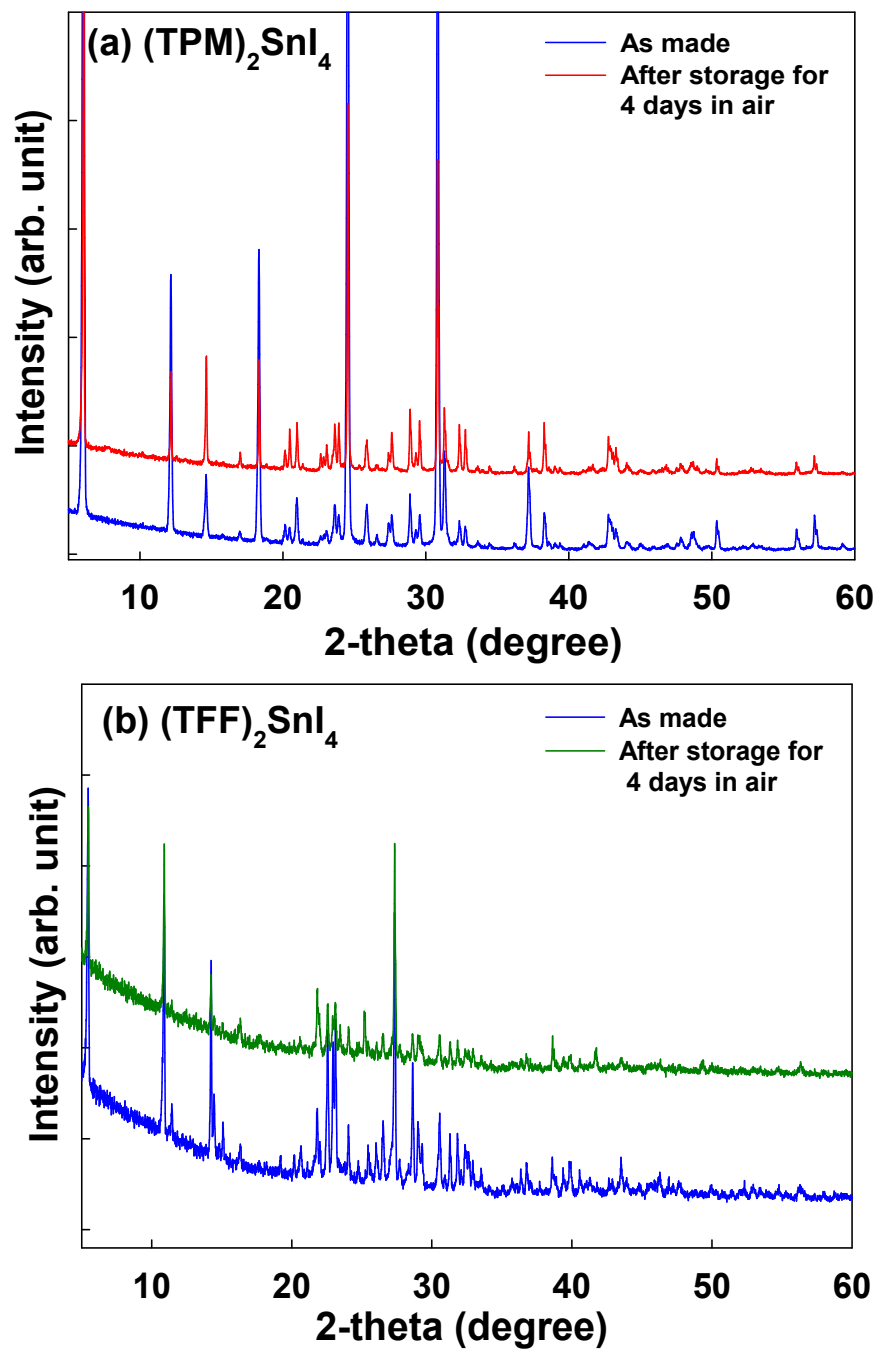

**Figure S3.** Comparison of the PXRD patterns for the as made  $(\text{TPM})_2\text{SnI}_4$  and  $(\text{TFF})_2\text{SnI}_4$  perovskites crystals and the ones after storage in air for 4 days.
